# Supplementary material for: Effect of Metformin on the Prognosis of Gastric Cancer Patients with Type 2 Diabetes Mellitus: A Meta-Analysis Based on Retrospective Cohort Studies
Source: Int J Endocrinol. 2023 Mar 4;2023:5892731. doi: 10.1155/2023/5892731 (PMC10008112; doi:10.1155/2023/5892731)
Supplement: Supplementary Materials — Supplementary Table 1. Supplementary characteristics of studies included in the meta-analysis. Supplementary Table 2. Quality assessment of studies included. PRISMA 2009 checklist. Preferred Reporting Items for Systematic Reviews and Meta-Analyses: The PRISMA Statement. [file 5892731.f1.zip]

Archive with 3 entries (3 files):
- PRISMA 2009 checklist.doc
- Supplementary Table 1.docx
- Supplementary Table 2.doc
